# Supplementary material for: Comparing Video-Assisted and Verbal Explanations in Japanese Hospital Dentistry: Patient Evaluations in Third Molar Extraction and Medical-Dental Collaborative Care
Source: Research Square preprint supplement (doi:10.21203/rs.3.rs-8060914/v1), 2026-01-01

supplementary file 1: Patient questionnaire used in this study

Please help us by completing this questionnaire regarding the explanation you received today (for one of the following: preoperative explanation for third molar extraction,/postoperative home care instructions following tooth extraction/ perioperative oral management).

For each item below, please select the point on the scale that best reflects your opinion.

### 1. Clarity of the explanation

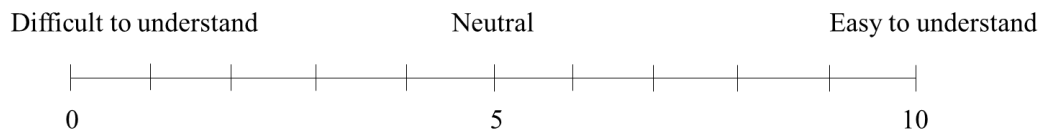

## 2. Appropriateness of the explanation length

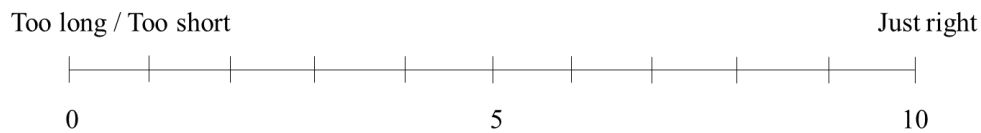

### 3. Change in fear or anxiety after the explanation

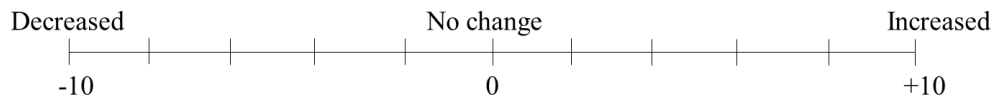

Supplement: Supplementary file 1 [file 6cf6f46f3ba2227e7b4bd5c3.pdf]
